# Supplementary material for: Construction of A High-Density Genetic Map And Detection of A Major QTL of Resistance To Powdery Mildew (Erysiphe Necator Sch.) In Caucasian Grapes (Vitis Vinifera L.)
Source: Research Square preprint supplement (doi:10.21203/rs.3.rs-439287/v1), 2021-05-07
Supplement: Supplementary file 1 [file 02bcaa5c2dd3152b17212b8c.xlsx]

## Sheet: Table S2
Table S2. Significant QTL identified from interval mapping (parametric model, EM method and LOD significance thresholds determined by 1,000 permutation tests and p-value < 0.05) carried out with Shavtsitska map and different phenotypic data related to E. necator infection recorded for the population 50042 (‘Shavtsitska’ x ‘Glera’).
Infection feature	Experiment replicate	dpi	Phenotypic data code	Chr	Bayes conf. intervals (α=0.95)			LOD	p-value
					Peak position cM	Lower limit cM	Upper limit cM
E. necator mycelium growth	1	3	MI1D3	13	42.87	35.21	55.33	7.02	<0.001
	2	3	MI2D3	13	46.70	42.87	48.89	9.82	<0.001
	3	3	MI3D3	13	47.00	45.61	48.89	21.60	<0.001
	averaged data	3	MI4D3	13	46.70	46.70	48.89	23.98	<0.001
	1	5	MI1D5	13	48.00	46.70	49.43	15.46	<0.001
	2	5	MI2D5	13	46.70	46.70	48.89	22.43	<0.001
	3	5	MI3D5	13	47.00	46.70	48.89	32.57	<0.001
	averaged data	5	MI4D5	13	47.00	46.70	48.89	40.17	<0.001
	1	7	MI1D7	13	46.70	45.61	49.43	19.34	<0.001
	2	7	MI2D7	13	46.70	44.51	48.89	17.82	<0.001
	3	7	MI3D7	13	47.00	46.15	48.89	22.04	<0.001
	averaged data	7	MI4D7	13	46.70	46.70	48.89	36.80	<0.001
	1	10	MI1D10	13	48.00	45.61	53.21	14.98	<0.001
	2	10	MI2D10	13	46.70	28.66	53.21	8.63	<0.001
	3	10	MI3D10	13	46.70	37.39	69.48	7.25	<0.001
	averaged data	10	MI4D10	13	46.70	45.61	48.89	21.12	<0.001
E. necator sporulation intensity	1	5	SI1D5	13	46.15	42.87	48.89	14.23	<0.001
	1	5	SI1D5	14	4.47	0.00	14.28	3.93	0.008
	2	5	SI2D5	13	46.70	45.61	48.89	37.73	<0.001
	3	5	SI3D5	13	46.70	46.70	48.89	40.32	<0.001
	averaged data	5	SI4D5	13	46.70	46.70	48.89	61.61	<0.001
	averaged data	5	SI4D5	14	1.69	0.00	14.28	3.46	0.020
	1	7	SI1D7	13	47.00	46.70	48.89	31.51	<0.001
	1	7	SI1D7	14	4.47	0.00	14.80	3.84	0.009
	2	7	SI2D7	13	46.70	44.51	48.89	37.70	<0.001
	3	7	SI3D7	13	47.00	46.70	48.89	41.61	<0.001
	averaged data	7	SI4D7	13	47.00	46.70	48.89	61.45	<0.001
	1	10	SI1D10	13	48.00	46.70	49.43	20.38	<0.001
	2	10	SI2D10	13	46.70	42.87	48.89	13.29	<0.001
	3	10	SI3D10	13	47.00	45.61	56.43	20.46	<0.001
	averaged data	10	SI4D10	13	47.00	46.70	48.89	36.41	<0.001
Presence of plant necrosis	3	3	NI3D3	2	61.94	6.09	62.54	3.12	0.045
	3	3	NI3D3	13	50.00	46.70	56.97	5.98	<0.001
	averaged data	3	NI4D3	7	25.02	8.82	42.32	2.96	0.048
	averaged data	3	NI4D3	13	48.89	43.97	56.43	5.87	<0.001
	1	5	NI1D5	13	48.00	42.87	53.21	9.23	<0.001
	2	5	NI2D5	13	46.70	42.87	48.89	17.18	<0.001
	3	5	NI3D5	13	50.00	46.70	55.33	19.25	<0.001
	averaged data	5	NI4D5	13	46.70	46.70	48.89	31.65	<0.001
	1	7	NI1D7	13	42.87	39.59	53.21	8.26	<0.001
	2	7	NI2D7	13	42.87	41.23	48.89	17.21	<0.001
	3	7	NI3D7	13	50.00	46.70	53.21	27.76	<0.001
	averaged data	7	NI4D7	13	50.00	42.87	53.21	32.14	<0.001
	1	10	NI1D10	13	49.43	42.87	53.21	10.35	<0.001
	2	10	NI2D10	13	46.70	41.23	53.21	11.31	<0.001
	3	10	NI3D10	13	49.43	46.70	53.21	22.73	<0.001
	averaged data	10	NI4D10	13	49.43	46.70	53.21	29.01	<0.001
Square root of conidia/ml	1	10	RQSPI1	13	48.00	46.15	48.89	22.01	<0.001
	2	10	RQSPI2	13	46.15	42.87	48.89	10.78	<0.001
	3	10	RQSPI3	13	46.70	45.61	48.89	14.80	<0.001
	averaged data	10	RQSPI4	13	46.70	45.61	48.89	28.68	<0.001
rAUDPC for mycelium growth	1		rAMI1	13	47.00	46.70	53.21	17.98	<0.001
	2		rAMI2	13	46.70	45.61	48.89	21.74	<0.001
	3		rAMI3	13	47.00	46.70	48.89	26.86	<0.001
	averaged data		rAMI4	13	46.70	46.70	48.89	37.72	<0.001
rAUDPC for sporulation intensity	1		rASI1	13	47.00	46.70	48.89	30.74	<0.001
	1		rASI1	14	8.31	0.00	15.89	3.40	0.026
	2		rASI2	13	46.70	44.51	48.89	41.68	<0.001
	3		rASI3	13	46.70	46.70	48.89	45.11	<0.001
	averaged data		rASI4	13	47.00	46.70	48.89	64.88	<0.001
