# Supplementary material for: Construction of A High-Density Genetic Map And Detection of A Major QTL of Resistance To Powdery Mildew (Erysiphe Necator Sch.) In Caucasian Grapes (Vitis Vinifera L.)
Source: Research Square preprint supplement (doi:10.21203/rs.3.rs-439287/v1), 2021-05-07
Supplement: Supplementary file 2 [file e64c47a4a6c0ff4d0856be97.docx]

**
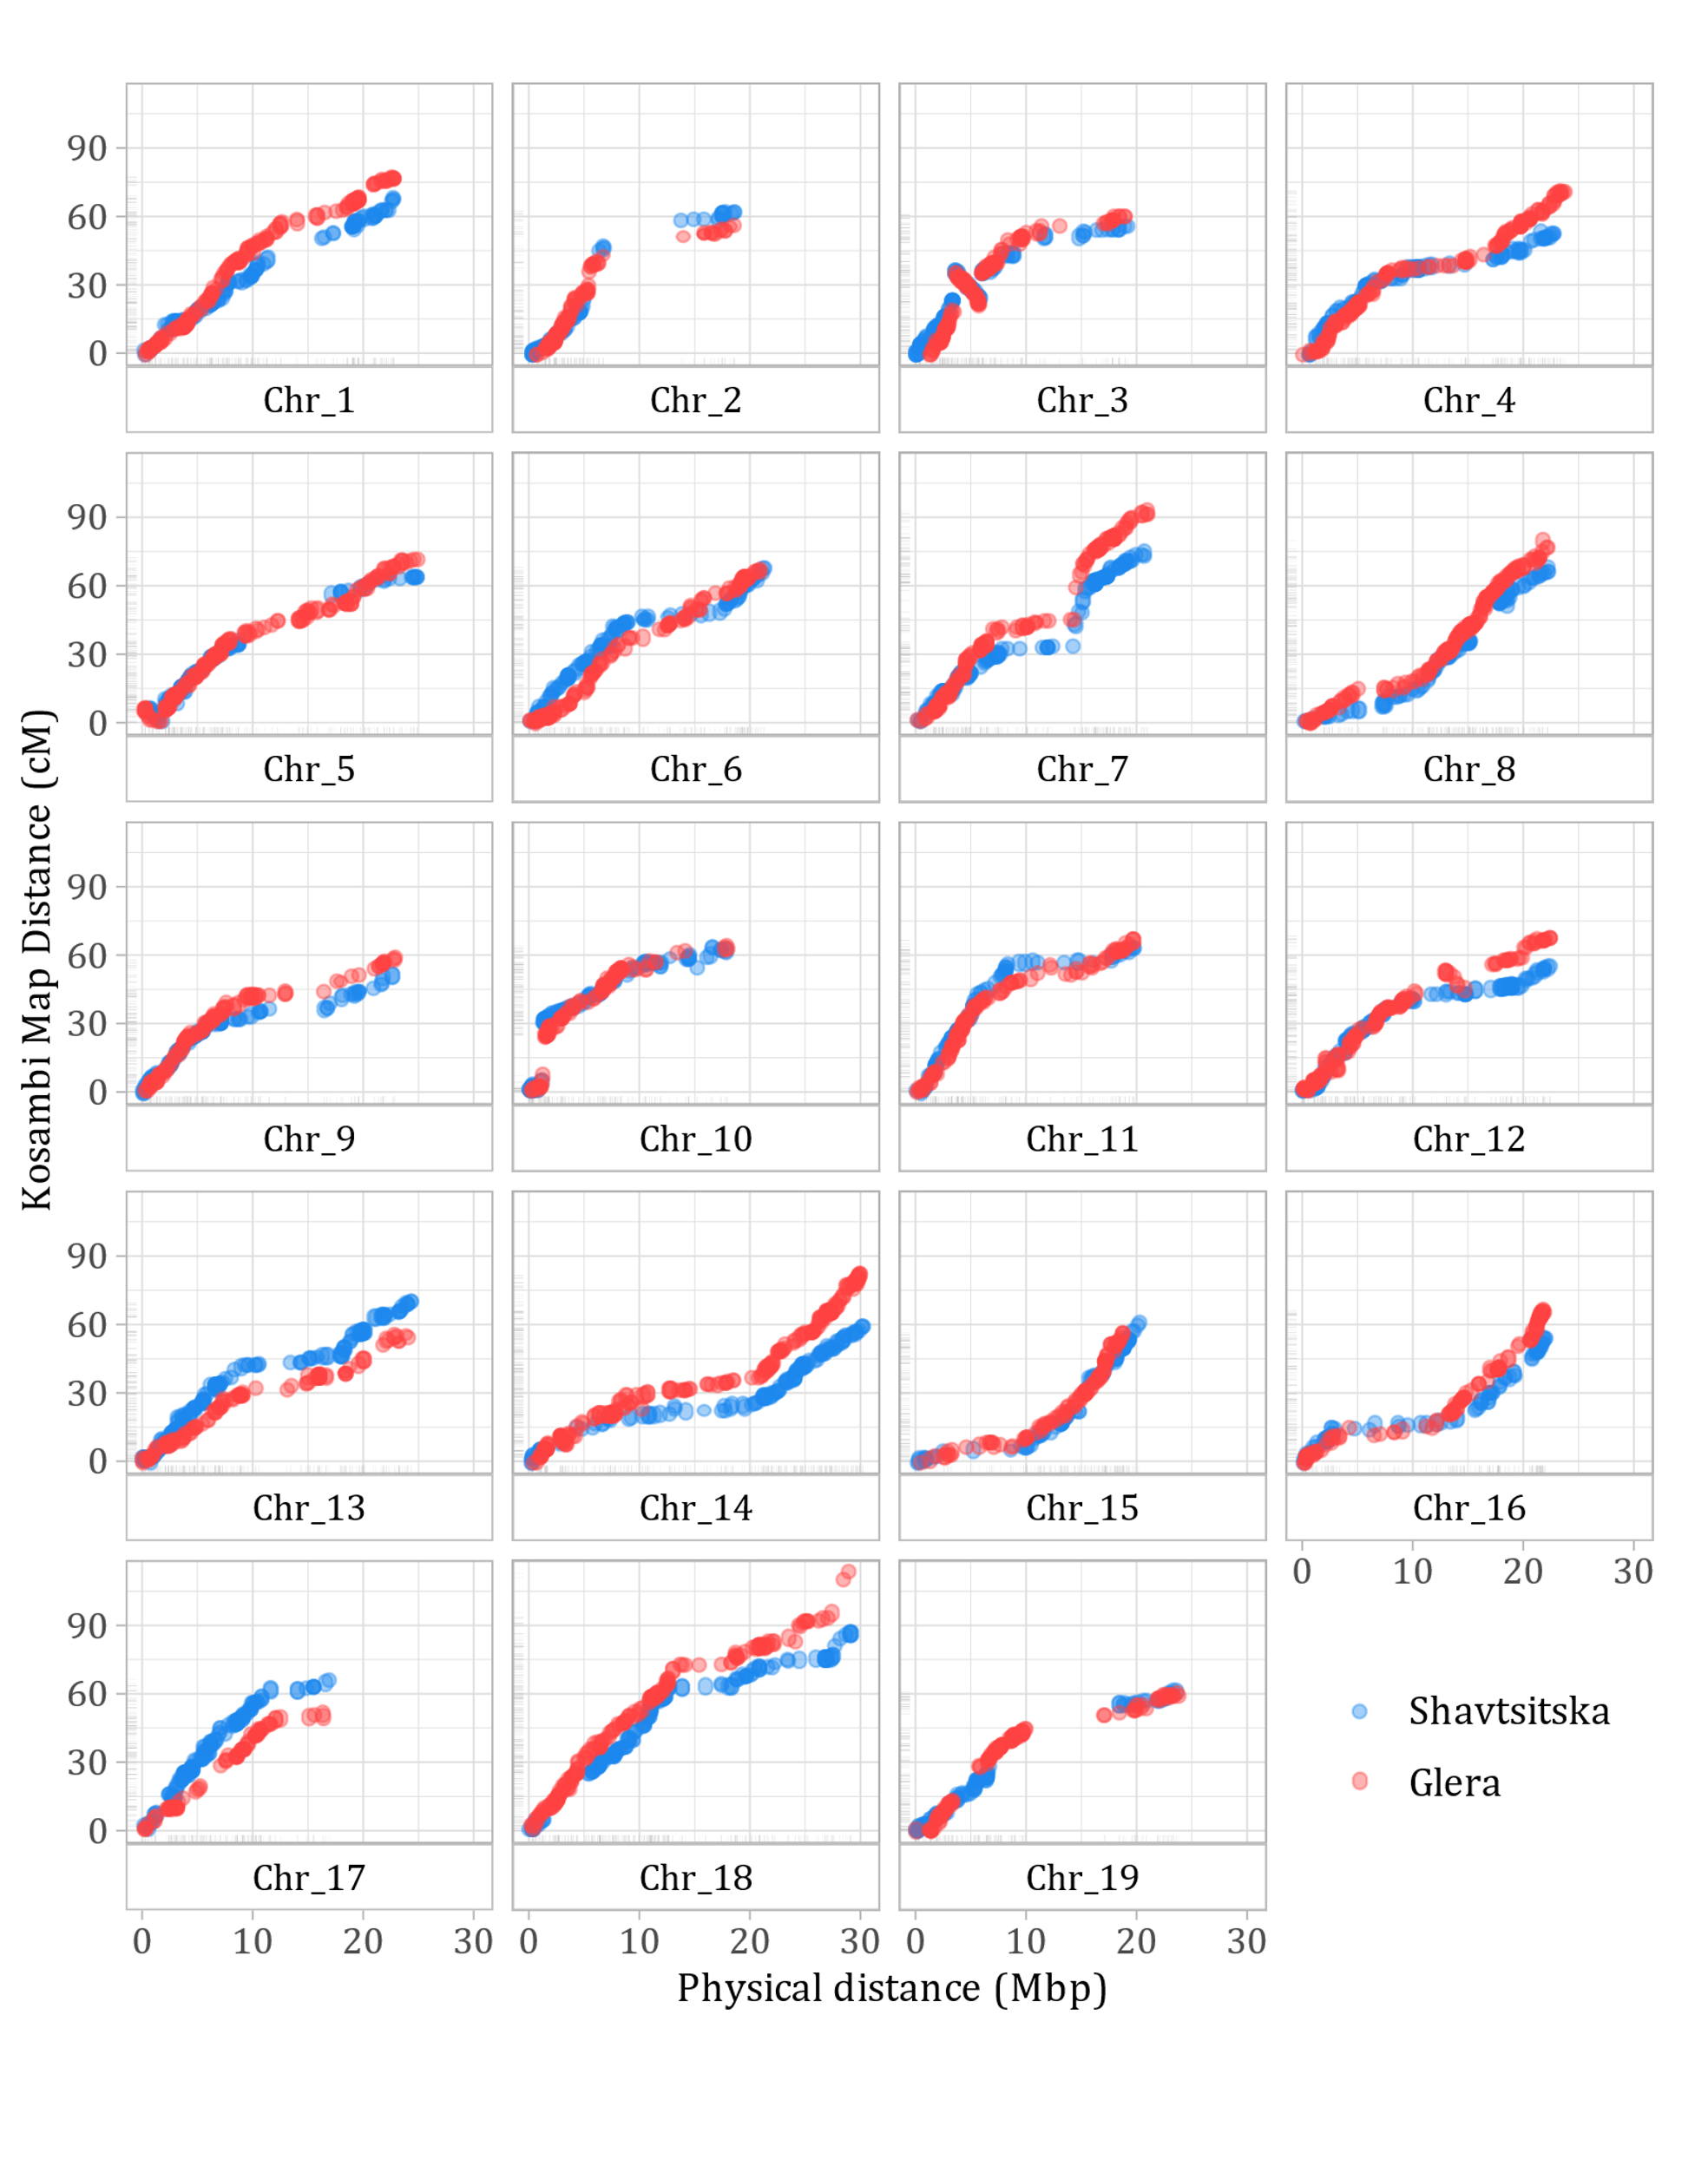
Figure S4.** Dot plot for SNP markers utilized for the development of the parental linkage maps of ‘Shavtsitska’ (blue) and ‘Glera’ (red). On the x axis the SNP physical distances on grape reference genome ‘PN40024’ while on y axis the SNP genetic distances.
